# Supplementary material for: Changes in Immunological Parameters by Aging in Rural Healthy Indian Adults and their Associations with Sex and Lifestyle
Source: Research Square preprint supplement (doi:10.21203/rs.3.rs-1216293/v1), 2022-01-05
Supplement: Supplementary file 1 [file a4f7c4069f9f7b888b88858b.docx]

**Table S1.** Statistics of linear regression analysis predicting effect of aging on immunological parameters.

| **Item** | **Total (*n* = 67)** | | |  | **Female (*n* = 33)** | | |  | **Male (*n* = 34)** | | |
| --- | --- | --- | --- | --- | --- | --- | --- | --- | --- | --- | --- |
| **Estimate** | **95% CI** | ***p*-value** |  | **Estimate** | **95% CI** | ***p*-value** |  | **Estimate** | **95% CI** | *p*-value |
| CD3−CD56+ NK cells (%) | 1.86 | [0.85, 2.87] | < 0.001** |  | 0.94 | [−0.52, 2.40] | 0.215 |  | 2.73 | [1.37, 4.10] | < 0.001** |
| CD3−CD56+ NK cells (counts/105 PBMCs) | 972.8 | [355.5, 1590.1] | 0.003** |  | 652.5 | [−293.9, 1598.9] | 0.186 |  | 1279.4 | [467.1, 2091.8] | 0.004** |
| CFSE+7AAD+ target cells (%) | −0.18 | [−0.75, 0.38] | 0.530 |  | −0.22 | [−1.14, 0.70] | 0.646 |  | −0.13 | [−0.78, 0.52] | 0.697 |
| CD107a+CD56+ NK cells (%) | −0.88 | [−1.68, −0.08] | 0.034* |  | −1.05 | [−2.13, 0.03] | 0.065 |  | −0.72 | [−1.91, 0.48] | 0.247 |
| CD3+CD4+ T cells (%) | 2.27 | [0.87, 3.66] | 0.002** |  | 3.18 | [1.10, 5.26] | 0.005** |  | 1.40 | [−0.46, 3.26] | 0.149 |
| CD3+CD8+ T cells (%) | −3.04 | [−4.25, −1.83] | < 0.001** |  | −2.49 | [−4.25, −0.73] | 0.009** |  | −3.57 | [−5.25, −1.88] | < 0.001** |
| CD4/CD8 ratio | 0.43 | [0.24, 0.62] | < 0.001** |  | 0.45 | [0.18, 0.72] | 0.003** |  | 0.42 | [0.15, 0.69] | 0.005** |
| IFN-γ+CD4+ T cells (%) | 0.07 | [−0.74, 0.88] | 0.870 |  | −0.17 | [−1.35, 1.00] | 0.777 |  | 0.30 | [−0.84, 1.44] | 0.613 |
| IFN-γ+CD8+ T cells (%) | 5.05 | [3.08, 7.02] | < 0.001** |  | 5.90 | [3.18, 8.62] | < 0.001** |  | 4.24 | [1.35, 7.13] | 0.007** |
| CD19+ B cells (%) | 0.09 | [−0.78, 0.96] | 0.840 |  | 0.17 | [−1.02, 1.36] | 0.778 |  | 0.02 | [−1.23, 1.27] | 0.977 |
| CD38+CD138+ Plasma cells (%) | 1.05 | [−0.46, 2.57] | 0.177 |  | 0.21 | [−2.01, 2.43] | 0.854 |  | 1.85 | [−0.23, 3.93] | 0.091 |
| CD38+CD138− Plasmablast cells (%) | −1.05 | [−2.56, 0.46] | 0.178 |  | −0.21 | [−2.43, 2.01] | 0.855 |  | −1.85 | [−3.93, 0.23] | 0.091 |
| IgG+CD19+ B cells (%) | −0.04 | [−0.54, 0.47] | 0.880 |  | 0.22 | [−0.55, 0.99] | 0.582 |  | −0.28 | [−0.94, 0.37] | 0.404 |
| IgA+CD19+ B cells (%) | −0.02 | [−0.61, 0.57] | 0.939 |  | −0.38 | [−1.35, 0.59] | 0.451 |  | 0.32 | [−0.37, 1.01] | 0.375 |

The effect size of aging (6 age groups: 21–30, 31–40, 41–50, 51–60, 61–70, and 71–80 years) on each immunological parameter was evaluated by linear regression model (* *p* < 0.050, ** *p* < 0.010).
